# Supplementary material
Source: MDPI journal article supplement (https://www.mdpi.com/2073-445X/9/8/267)
Supplement: s1 [file s1]

**Supplementary Material S1 Questionnaire of the structured household survey.**

Note: The questionnaire was implemented in Azerbaijani and Georgian language

## **Socio-Economic Survey of Farming Households**

**By the research project Common village pastures – Comparative case studies in  
Azerbaijan and Georgia**

### **Partner Universities:**

**Greifswald University, Germany**

**Agricultural University of Georgia**

**Azerbaijan State Agrarian University**

With this survey, students and researchers collect socio-economic data on farming households using common village pastures in Azerbaijan and Georgia. This questionnaire is distributed to selected households in the project's study villages. The data are very important for doctoral works of students in the framework of the project and contribute to improving scientific knowledge on agriculture in Azerbaijan and Georgia.

We appreciate very much your cooperation with the students and would like to ask you to complete this questionnaire on socio-economic issues of farming households. We ensure you that your data will not be given to third groups or persons.

Note: This questionnaire should be answered by household members of 18 years or older

Name of Interviewer:\_\_\_\_\_

Code:\_\_\_\_\_

Date:\_\_\_\_/\_\_\_\_/2016

## 1. General information

### 1.1 Address

|       |                                       |       |
|-------|---------------------------------------|-------|
| 1.1.1 | Name of respondent:                   | ..... |
| 1.1.2 | Age of respondent:                    | ..... |
| 1.1.3 | Street:                               | ..... |
| 1.1.4 | Neighborhood:                         | ..... |
| 1.1.5 | Village:                              | ..... |
| 1.1.6 | E-mail-Address:                       | ..... |
| 1.1.7 | Phone:                                | ..... |
| 1.1.8 | How long do you live in this villages | ..... |

Relationship of respondent to household head

|  |
|--|
|  |
|--|

## 1.2 Household Characteristics

### 1.2.1 Who lives in your household? Please list all household members living in your house for more than 3 months in a year and are helping in your household

| Category                                                                                                                                                                                                        | Person 1                                                                                                                                   | Person 2                                                                                                                                                                                                                                                                                                                     | Person 3 | Person 4 | Person 5 | Person 6 | ... |
|-----------------------------------------------------------------------------------------------------------------------------------------------------------------------------------------------------------------|--------------------------------------------------------------------------------------------------------------------------------------------|------------------------------------------------------------------------------------------------------------------------------------------------------------------------------------------------------------------------------------------------------------------------------------------------------------------------------|----------|----------|----------|----------|-----|
| 1.2.1.1 Name                                                                                                                                                                                                    |                                                                                                                                            |                                                                                                                                                                                                                                                                                                                              |          |          |          |          |     |
| 1.2.1.2 Relationship <sup>a)</sup>                                                                                                                                                                              |                                                                                                                                            |                                                                                                                                                                                                                                                                                                                              |          |          |          |          |     |
| 1.2.1.3 Age                                                                                                                                                                                                     |                                                                                                                                            |                                                                                                                                                                                                                                                                                                                              |          |          |          |          |     |
| 1.2.1.4 Marital status <sup>b)</sup>                                                                                                                                                                            |                                                                                                                                            |                                                                                                                                                                                                                                                                                                                              |          |          |          |          |     |
| 1.2.1.5 Gender (1. Female, 2. Male)                                                                                                                                                                             |                                                                                                                                            |                                                                                                                                                                                                                                                                                                                              |          |          |          |          |     |
| 1.2.1.6 Education <sup>c)</sup>                                                                                                                                                                                 |                                                                                                                                            |                                                                                                                                                                                                                                                                                                                              |          |          |          |          |     |
| 1.2.1.7 Activity <sup>d)</sup>                                                                                                                                                                                  |                                                                                                                                            |                                                                                                                                                                                                                                                                                                                              |          |          |          |          |     |
| a)<br><br>1 Head of family<br>2 Husband/Wife<br>3 Daughter<br>4 Son<br>5 Daughter/son in law<br>6 Grandparent<br>7 Grandchild<br>8 Brother/Sister/<br>9 Other parental relatives<br>10 Other maternal relatives | b)<br><br>I.Single<br>II.Married<br>III.Divorced<br>IV.Widowed<br>V.Separated                                                              | c)<br><br>A) Below school age<br>B) Pupil<br>C) Graduated from school<br>D) Student in university<br>E) Graduated from university<br>F) Student in college or technical school<br>G) Graduated from college or technical school<br>H) Student in vocational school<br>I) Graduated from vocational school<br>J) Not educated |          |          |          |          |     |
|                                                                                                                                                                                                                 | d)<br>a. Public job<br>b. Agricultural activities<br>c. Searching for job<br>d. Pensioner<br>e. Pupil/student<br>f. Other (please specify) |                                                                                                                                                                                                                                                                                                                              |          |          |          |          |     |

## 2. Crop Farming

### 2.1 Area

#### 2.1.1 Do you have activities in crop farming?

☐

Yes

☐

No

If yes, please proceed below.

If no, please go to question 3.1.

#### 2.1.2 Which areas for crop farming do you grow? Please cross and fill in the area.

| Category             | Total (in ha)            |  | thereof |                                  |                            |                        |
|----------------------|--------------------------|--|---------|----------------------------------|----------------------------|------------------------|
|                      |                          |  | Private | Leased from local administration | Leased from private person | Rented to other person |
| 2.1.1.1 Home garden  | <input type="checkbox"/> |  |         |                                  |                            |                        |
| 2.1.1.2 Land plot    | <input type="checkbox"/> |  |         |                                  |                            |                        |
| 2.1.1.3 Hay meadows  | <input type="checkbox"/> |  |         |                                  |                            |                        |
| 2.1.1.4 Fruit garden | <input type="checkbox"/> |  |         |                                  |                            |                        |
| 2.1.1.5 Greenhouse   | <input type="checkbox"/> |  |         |                                  |                            |                        |
| 2.1.1.6 Vineyard     | <input type="checkbox"/> |  |         |                                  |                            |                        |

## 2.2 Cropping

### 2.2.1 What kind of plants (crops) do you grow?

|                     |                          |                                       |                          |
|---------------------|--------------------------|---------------------------------------|--------------------------|
| 2.2.1.1 Wheat       | <input type="checkbox"/> | 2.2.1.2 Onion                         | <input type="checkbox"/> |
| 2.2.1.3 Barley      | <input type="checkbox"/> | 2.2.1.4 Tomato                        | <input type="checkbox"/> |
| 2.2.1.5 Maize       | <input type="checkbox"/> | 2.2.1.6 Eggplant                      | <input type="checkbox"/> |
| 2.2.1.7 Potato      | <input type="checkbox"/> | 2.2.1.8 Garlic                        | <input type="checkbox"/> |
| 2.2.1.9 Cabbage     | <input type="checkbox"/> | 2.2.1.10 Capsicum                     | <input type="checkbox"/> |
| 2.2.1.11 Carrot     | <input type="checkbox"/> | 2.2.1.12 Radish                       | <input type="checkbox"/> |
| 2.2.1.13 Cucumber   | <input type="checkbox"/> | 2.2.1.14 Herbs                        | <input type="checkbox"/> |
| 2.2.1.15 Sun flower | <input type="checkbox"/> | 2.2.1.16 Others: please specify _____ | <input type="checkbox"/> |
| 2.2.1.17 Bean       | <input type="checkbox"/> |                                       |                          |

#### 2.2.2 What is the most important crop for your household (for cash and own consumption)?

for cash \_\_\_\_\_

for own consumption \_\_\_\_\_

### 2.2.3 Do you sell crop products?

☐ Yes

☐ No

## 3. Fruit growing

### 3.1 Do you grow fruits?

☐ Yes

\_\_\_\_\_ If yes, please proceed below.

☐ No

\_\_\_\_\_ If no, please go to question 4.1

### 3.2 Which fruits do you produce?

|        |                              |                          |
|--------|------------------------------|--------------------------|
| 3.2.1  | Apple                        | <input type="checkbox"/> |
| 3.2.2  | Pear                         | <input type="checkbox"/> |
| 3.2.3  | Plum                         | <input type="checkbox"/> |
| 3.2.4  | Walnut                       | <input type="checkbox"/> |
| 3.2.5  | Hazelnut                     | <input type="checkbox"/> |
| 3.2.6  | Cornel cherry                | <input type="checkbox"/> |
| 3.2.7  | Apricot                      | <input type="checkbox"/> |
| 3.2.8  | Cherry                       | <input type="checkbox"/> |
| 3.2.9  | Raspberry                    | <input type="checkbox"/> |
| 3.2.10 | Wine                         | <input type="checkbox"/> |
| 3.2.11 | Others: please specify _____ | <input type="checkbox"/> |

### 3.3 What is the most important fruit for your household (for cash and own consumption)?

for cash \_\_\_\_\_

for own consumption \_\_\_\_\_

## 4. Livestock

### 4.1 Do you have livestock?

☐ Yes

\_\_\_\_\_ If yes, please proceed below.

☐ No

\_\_\_\_\_ If no, please go to question 5.1

### 4.1.1 Which kind of livestock do you have and how many?

| Category                       | Numbers                  |  |
|--------------------------------|--------------------------|--|
| 4.1.1.1 Cattle                 | <input type="checkbox"/> |  |
| A. Dairy cow                   |                          |  |
| B. Bull                        |                          |  |
| C. Calf (0-18 month)           |                          |  |
| 4.1.1.2 Sheep                  | <input type="checkbox"/> |  |
| A. Ewe                         |                          |  |
| B. Ram                         |                          |  |
| C. Lamb(0-12month)             |                          |  |
| 4.1.1.3 Goat                   | <input type="checkbox"/> |  |
| A. Mother Goat                 |                          |  |
| B. Ram                         |                          |  |
| C. Goat kid (0-12month)        |                          |  |
| 4.1.1.4 Water buffalo          | <input type="checkbox"/> |  |
| A. Dairy water buffalo         |                          |  |
| B. Bull                        |                          |  |
| C. Calf (0-18 month)           |                          |  |
| 4.1.1.5 Horse                  | <input type="checkbox"/> |  |
| 4.1.1.6 Donkey                 | <input type="checkbox"/> |  |
| 4.1.1.7 Pig                    | <input type="checkbox"/> |  |
| 4.1.1.8 Other (please specify) | <input type="checkbox"/> |  |

## 4.2 Marketing of livestock products

### 4.2.1 Which of the following livestock products do you sell?

| Category              | Cattle                   | Sheep                    | Goat                     |
|-----------------------|--------------------------|--------------------------|--------------------------|
| 4.2.1.1 Milk products | <input type="checkbox"/> | <input type="checkbox"/> | <input type="checkbox"/> |
| 4.2.1.2 Meat          | <input type="checkbox"/> | <input type="checkbox"/> | <input type="checkbox"/> |
| 4.2.1.3 Live animals  | <input type="checkbox"/> | <input type="checkbox"/> | <input type="checkbox"/> |
| 4.2.1.4 Wool          |                          | <input type="checkbox"/> |                          |
| 4.2.1.5 Others        | <input type="checkbox"/> | <input type="checkbox"/> | <input type="checkbox"/> |

### 4.3 Use of pasture

#### 4.3.1 Which kind of following pastures do you use for your livestock?

| Category                                            | Summer months            | Winter months            | Others season            |
|-----------------------------------------------------|--------------------------|--------------------------|--------------------------|
| 4.3.1.1 Common village pasture                      | <input type="checkbox"/> | <input type="checkbox"/> | <input type="checkbox"/> |
| 4.3.1.2 Winter pasture                              | <input type="checkbox"/> | <input type="checkbox"/> | <input type="checkbox"/> |
| 4.3.1.3 Summer pasture                              | <input type="checkbox"/> | <input type="checkbox"/> | <input type="checkbox"/> |
| 4.3.1.4 Hay meadow and arable land after harvesting | <input type="checkbox"/> | <input type="checkbox"/> | <input type="checkbox"/> |
| 4.3.1.5 Vineyard                                    | <input type="checkbox"/> | <input type="checkbox"/> | <input type="checkbox"/> |
| 4.3.1.6 Others, please specify_____                 | <input type="checkbox"/> | <input type="checkbox"/> | <input type="checkbox"/> |

#### 4.3.2 If you use summer pastures, in which district (rayon) is this pasture located?

---

---

#### 4.3.3 If you use winter pastures, in which district (rayon) is this pasture located?

---

---

#### 4.3.4 Do you use other seasonal pastures, in which district (rayon) is this pasture located?

---

---

#### 4.3.5 Who herds your cattle?

| Category                                            | Summer months            | Winter months            | Other season             |
|-----------------------------------------------------|--------------------------|--------------------------|--------------------------|
| 4.3.5.1 Herded by Household members                 | <input type="checkbox"/> | <input type="checkbox"/> | <input type="checkbox"/> |
| 4.3.5.2 Herded by a shepherd hired by the Household | <input type="checkbox"/> | <input type="checkbox"/> | <input type="checkbox"/> |
| 4.3.5.3 Herded by relatives                         | <input type="checkbox"/> | <input type="checkbox"/> | <input type="checkbox"/> |
| 4.3.5.4 Herded in a common herd organized in turns  | <input type="checkbox"/> | <input type="checkbox"/> | <input type="checkbox"/> |
| 4.3.5.5 Herded in a common herd by payed shepherd   | <input type="checkbox"/> | <input type="checkbox"/> | <input type="checkbox"/> |
| 4.3.5.6 Without herding                             | <input type="checkbox"/> | <input type="checkbox"/> | <input type="checkbox"/> |

#### 4.3.6 Who herds your sheep and goats?

| Category                                            | Summer months            | Winter months            | Others season            |
|-----------------------------------------------------|--------------------------|--------------------------|--------------------------|
| 4.3.6.1 Herded by Household members                 | <input type="checkbox"/> | <input type="checkbox"/> | <input type="checkbox"/> |
| 4.3.6.2 Herded by a shepherd hired by the Household | <input type="checkbox"/> | <input type="checkbox"/> | <input type="checkbox"/> |
| 4.3.6.3 Herded by relatives                         | <input type="checkbox"/> | <input type="checkbox"/> | <input type="checkbox"/> |
| 4.3.6.4 Herded in a common herd organized in turns  | <input type="checkbox"/> | <input type="checkbox"/> | <input type="checkbox"/> |
| 4.3.6.5 Herded in a common herd by payed shepherd   | <input type="checkbox"/> | <input type="checkbox"/> | <input type="checkbox"/> |
| 4.3.6.6 Without herding                             | <input type="checkbox"/> | <input type="checkbox"/> | <input type="checkbox"/> |

### 5. Beekeeping

#### 5.1 Do you engage in beekeeping?

☐

Yes

☐

No

If yes, how many beehives do you have?

---

### 6. Poultry

#### 6.1 Do you engage in poultry keeping?

☐

Yes

☐

No

If yes, please proceed below.

If no, please go to question 7.1

#### 6.1.1 Which kind of poultry do you have and how much?

| Category                             |                          | Number |
|--------------------------------------|--------------------------|--------|
| 6.1.1.1 Hen                          | <input type="checkbox"/> |        |
| 6.1.1.2 Turkey                       | <input type="checkbox"/> |        |
| 6.1.1.3 Goose                        | <input type="checkbox"/> |        |
| 6.1.1.4 Duck                         | <input type="checkbox"/> |        |
| 6.1.1.5 Others, please specify _____ | <input type="checkbox"/> |        |

### 7. Other off farm activities

#### 7.1 Do you have income sources apart from own agriculture?

☐

Yes

☐

No

If yes, which income sources do you have?

If no, please go to question 8.1



|                                                                                     |                          |
|-------------------------------------------------------------------------------------|--------------------------|
| 7.1.1 Public employment                                                             | <input type="checkbox"/> |
| 7.1.2 Permanent employment in private enterprises                                   | <input type="checkbox"/> |
| 7.1.3 Self-employment                                                               | <input type="checkbox"/> |
| 7.1.4 /Salaried work                                                                | <input type="checkbox"/> |
| 7.1.5 Pension (State retirement or disability benefits)                             | <input type="checkbox"/> |
| 7.1.6 Other state benefits (child benefits, job-Seekers allowance, social services) | <input type="checkbox"/> |
| 7.1.7 Other private benefits (student grants, support from relatives etc.)          | <input type="checkbox"/> |
| 7.1.8 Interest from savings and investments                                         | <input type="checkbox"/> |
| 7.1.9 Rent of real estates                                                          | <input type="checkbox"/> |
| 7.1.10 Other(please,note)                                                           | <input type="checkbox"/> |

**7.2 Which of the income sources listed in the table above is most important for your household?**

---

(Note: The survey continued with questions on topics not used in the analysis of this manuscript)

**Thanks for taking part in this survey!**

## Supplementary Material S2: Contribution margin and household income calculations

### 1. Preliminary considerations

All contribution margin calculations were performed in the local currencies (New Azerbaijani Manat (AZN) or Georgian Lari (GEL)). Major indicators were then converted to EUR using the average exchange rate for 2016, which is the year for which calculations were performed. The exchange rates are 1 EUR= 0,526701 AZN and 1 EUR = 0,356336 GEL (for 1. January 2016–31. December 2016, from <https://fxtop.com/de/historische-wechselkurse.php>).

### 2. Livestock, poultry and beekeeping

For household income calculations the contribution margins were multiplied with the respective mother animal unit held by the household as recorded in household survey data (Supplementary Material S19).

**Table S3.** Cost-revenue calculation for cattle keeping (per milk cow unit).

| Item                                | Unit                   | Azerbaijan    |               |               | Georgia        |                |                |
|-------------------------------------|------------------------|---------------|---------------|---------------|----------------|----------------|----------------|
|                                     |                        | Atabey        | Keremli       | Plankend      | Gombori        | Arashenda      | Shakhvetila    |
| Currency of calculation             |                        | AZN           | AZN           | AZN           | GEL            | GEL            | GEL            |
| <b>Main indicators</b>              |                        |               |               |               |                |                |                |
| Herd size                           | head                   | 2.00          | 3.00          | 2.00          | 3.00           | 3.00           | 4.00           |
| Productive lifetime                 | years                  | 8.00          | 8.00          | 8.00          | 8.00           | 8.00           | 8.00           |
| Bulls per cow                       | Ratio                  | 0.13          | 0.13          | 0.13          | 0.13           | 0.13           | 0.13           |
| Live weight                         | kg                     | 250.00        | 250.00        | 250.00        | 250.00         | 250.00         | 250.00         |
| <b>Revenue</b>                      |                        |               |               |               |                |                |                |
| Calf                                | AZN or GEL/unit        | 323.99        | 495.00        | 315.36        | 323.99         | 456.00         | 328.00         |
| Old cow                             | AZN or GEL/unit        | 24.38         | 20.31         | 20.31         | 32.00          | 24.00          | 27.00          |
| Milk and milk products              | AZN or GEL/unit        | 480.00        | 368.78        | 405.00        | 784.00         | 720.00         | 900.00         |
| <b>Total revenue</b>                | <b>AZN or GEL/unit</b> | <b>828.37</b> | <b>884.09</b> | <b>740.67</b> | <b>1139.99</b> | <b>1200.00</b> | <b>1255.00</b> |
| <b>Variable costs</b>               |                        |               |               |               |                |                |                |
| Flock replacement (male and female) | AZN or GEL/unit        | 104.52        | 112.29        | 96.29         | 128.57         | 135.00         | 118.00         |
| Feed costs                          | AZN or GEL/unit        | 188.95        | 276.50        | 192.80        | 255.67         | 276.00         | 382.00         |
| Herding fee                         | AZN or GEL/unit        | 35.00         | 30.00         | 35.00         |                |                |                |
| Veterinary care                     | AZN or GEL/unit        | 15.00         | 12.00         | 11.76         | 10.50          | 20.00          | 8.00           |
| Transport to market                 | AZN or GEL/unit        | 5.00          | 5.00          | 5.00          | 7.00           | 7.00           | 7.00           |
| <b>Total variable costs</b>         | <b>AZN or GEL/unit</b> | <b>348.47</b> | <b>435.79</b> | <b>340.85</b> | <b>401.74</b>  | <b>438.00</b>  | <b>515.00</b>  |
| <b>Contribution margin</b>          | <b>AZN or GEL/unit</b> | <b>479.90</b> | <b>448.30</b> | <b>399.82</b> | <b>738.25</b>  | <b>762.00</b>  | <b>740.00</b>  |
| <b>Contribution margin ratio</b>    | <b>%</b>               | <b>57.93</b>  | <b>50.71</b>  | <b>53.98</b>  | <b>64.76</b>   | <b>63.50</b>   | <b>58.96</b>   |
|                                     |                        |               |               |               |                |                |                |
| <i>Revenue</i>                      | <i>EUR/unit</i>        | <i>436.30</i> | <i>465.65</i> | <i>390.11</i> | <i>406.22</i>  | <i>427.60</i>  | <i>447.20</i>  |

|                            |                 |        |        |        |        |        |        |
|----------------------------|-----------------|--------|--------|--------|--------|--------|--------|
| <i>Variable costs</i>      | <i>EUR/unit</i> | 183.54 | 229.53 | 179.52 | 143.15 | 156.08 | 183.51 |
| <i>Contribution margin</i> | <i>EUR/unit</i> | 252.76 | 236.12 | 210.59 | 263.07 | 271.53 | 263.69 |

**Table S4.** Cost-revenue calculation for sheep keeping (per ewe unit).

| Item                                | Unit                   | Azerbaijan    |               |              | Georgia       |               |               |
|-------------------------------------|------------------------|---------------|---------------|--------------|---------------|---------------|---------------|
|                                     |                        | Atabey        | Keremli       | Plankend     | Gombori       | Arashenda     | Shakhvetil    |
| Currency of calculation             |                        | AZN           | AZN           | AZN          | GEL           | GEL           | GEL           |
| <b>Main indicators</b>              |                        |               |               |              |               |               |               |
| Herd size                           | heads                  | 20.00         | 15.00         | 18.00        | 18.00         | 15.00         | 10.00         |
| Productive lifetime                 | years                  | 7.00          | 7.00          | 7.00         | 7.00          | 7.00          | 7.00          |
| Rams per ewe                        | Ratio                  | 0.14          | 0.14          | 0.14         | 0.14          | 0.14          | 0.14          |
| Live weight                         | kg                     | 35.00         | 35.00         | 35.00        | 35.00         | 35.00         | 35.00         |
| <b>Revenue</b>                      |                        |               |               |              |               |               |               |
| Lamb                                | AZN or GEL/unit        | 81.78         | 99.26         | 89.25        | 126           | 119           | 126.00        |
| Old ewe                             | AZN or GEL/unit        | 8.00          | 7.35          | 6.30         | 7.73          | 7             | 7.00          |
| Milk and milk products              | AZN or GEL/unit        | 27.00         |               |              |               |               |               |
| Wool                                | AZN or GEL/unit        |               |               | 1.60         | 2             |               |               |
| <b>Total revenue</b>                | <b>AZN or GEL/unit</b> | <b>116.78</b> | <b>106.61</b> | <b>97.15</b> | <b>135.73</b> | <b>126.00</b> | <b>133.00</b> |
| <b>Variable costs</b>               |                        |               |               |              |               |               |               |
| Flock replacement (male and female) | AZN or GEL/unit        | 11.68         | 14.18         | 12.75        | 18.00         | 17.00         | 18.00         |
| Feed costs                          | AZN or GEL/unit        | 20.40         | 17.80         | 10.20        | 26.5          | 22            | 25            |
| Veterinary care                     | AZN or GEL/unit        | 5.00          | 5.00          | 1.46         | 1             | 1.5           | 1             |
| Washing                             | AZN or GEL/unit        | 0.30          |               | 0.17         | 2.4           | 2.4           | 2             |
| Dog feed                            | AZN or GEL/unit        |               | 1.80          | 0.52         |               |               | 1             |
| Transport to market                 | AZN or GEL/unit        | 2.00          | 2.00          | 2.00         | 3.00          | 3.00          | 3.00          |
| <b>Total variable costs</b>         | <b>AZN or GEL/unit</b> | <b>39.38</b>  | <b>40.78</b>  | <b>27.10</b> | <b>50.90</b>  | <b>45.90</b>  | <b>50.00</b>  |
| <b>Contribution margin</b>          | <b>AZN or GEL/unit</b> | <b>77.40</b>  | <b>65.83</b>  | <b>70.05</b> | <b>84.83</b>  | <b>80.10</b>  | <b>83.00</b>  |
| <b>Contribution margin ratio</b>    | <b>%</b>               | <b>66.28</b>  | <b>61.75</b>  | <b>72.10</b> | <b>62.50</b>  | <b>63.57</b>  | <b>62.41</b>  |
|                                     |                        |               |               |              |               |               |               |
| <i>Revenue</i>                      | <i>EUR/unit</i>        | 61.51         | 56.15         | 51.17        | 48.37         | 44.90         | 47.39         |
| <i>Variable costs</i>               | <i>EUR/unit</i>        | 20.74         | 21.48         | 14.27        | 18.14         | 16.36         | 17.82         |
| <i>Contribution margin</i>          | <i>EUR/unit</i>        | 40.77         | 34.67         | 36.90        | 30.23         | 28.54         | 29.58         |

**Table S5.** Cost-revenue calculation for goat keeping (per mother goat unit).

| Item                                | Unit                   | Azerbaijan   |               |               | Georgia       |               |               |
|-------------------------------------|------------------------|--------------|---------------|---------------|---------------|---------------|---------------|
|                                     |                        | Atabey       | Keremli       | Plankendi     | Gombori       | Arashenda     | Shakhvetil    |
| Currency of calculation             |                        | AZN          | AZN           | AZN           | GEL           | GEL           | GEL           |
| <b>Main indicators</b>              |                        |              |               |               |               |               |               |
| Productive lifetime                 | years                  | 5.00         | 5.00          | 5.00          | 5.00          | 5.00          | 5.00          |
| Live weight                         | kg                     | 35.00        | 30.00         | 30.00         | 35.00         | 35.00         | 35.00         |
| <b>Revenue</b>                      |                        |              |               |               |               |               |               |
| Goat kid (male)                     | AZN or GEL/unit        | 40.88        | 40.88         | 40.88         | 47            | 47            | 47            |
| Goat kid (female)                   | AZN or GEL/unit        | 36.79        | 36.79         | 36.79         | 47            | 47            | 47            |
| Milk and milk products              | AZN or GEL/unit        | 18.00        | 21.00         | 21.00         |               |               |               |
| Old goat                            | AZN or GEL/unit        | 3.84         | 3.84          | 3.84          | 7.00          | 7.00          | 7.00          |
| <b>Total revenue</b>                | <b>AZN or GEL/unit</b> | <b>99.51</b> | <b>102.51</b> | <b>102.51</b> | <b>101.00</b> | <b>101.00</b> | <b>101.00</b> |
| <b>Variable costs</b>               |                        |              |               |               |               |               |               |
| Flock replacement (male and female) | AZN or GEL/unit        | 15.53        | 15.53         | 15.53         | 18.80         | 18.80         | 18.80         |
| Feed costs                          | AZN or GEL/unit        | 16.32        | 14.24         | 8.16          | 21.20         | 17.60         | 20.00         |
| Veterinary care                     | AZN or GEL/unit        | 5.00         | 5.00          | 1.46          | 0.2           | 0.2           | 0.2           |
| Washing                             | AZN or GEL/unit        | 0.30         |               | 0.17          | 1             | 1             | 1             |
| Dog feed                            | AZN or GEL/unit        |              | 1.80          | 0.52          |               |               |               |
| Transport to market                 | AZN or GEL/unit        | 2.00         | 2.00          | 2.00          | 3.00          | 3.00          | 3.00          |
| <b>Total variable costs</b>         | <b>AZN or GEL/unit</b> | <b>39.15</b> | <b>38.57</b>  | <b>27.84</b>  | <b>44.20</b>  | <b>40.60</b>  | <b>43.00</b>  |
| <b>Contribution margin</b>          | <b>AZN or GEL/unit</b> | <b>60.36</b> | <b>63.94</b>  | <b>74.67</b>  | <b>56.80</b>  | <b>60.40</b>  | <b>58.00</b>  |
| <b>Contribution margin ratio</b>    | <b>%</b>               | <b>60.65</b> | <b>62.37</b>  | <b>72.84</b>  | <b>56.24</b>  | <b>59.80</b>  | <b>57.43</b>  |
|                                     |                        |              |               |               |               |               |               |
| <i>Revenue</i>                      | <i>EUR/unit</i>        | <i>52.41</i> | <i>53.99</i>  | <i>53.99</i>  | <i>35.99</i>  | <i>35.99</i>  | <i>35.99</i>  |
| <i>Variable costs</i>               | <i>EUR/unit</i>        | <i>20.62</i> | <i>20.32</i>  | <i>14.67</i>  | <i>15.75</i>  | <i>14.47</i>  | <i>15.32</i>  |
| <i>Contribution margin</i>          | <i>EUR/unit</i>        | <i>31.79</i> | <i>33.68</i>  | <i>39.33</i>  | <i>20.24</i>  | <i>21.52</i>  | <i>20.67</i>  |

**Table S6.** Cost-revenue calculation for pig keeping (per sow unit).

| Item                                | Unit                   | Azerbaijan |         |           | Georgia        |                   |                |
|-------------------------------------|------------------------|------------|---------|-----------|----------------|-------------------|----------------|
|                                     |                        | Atabey     | Keremli | Plankendi | Gombori        | Arashenda         | Shakhvetil     |
| Currency of calculation             |                        | AZN        | AZN     | AZN       | GEL            | GEL               | GEL            |
| <b>Main indicators</b>              |                        |            |         |           |                |                   |                |
| Productive lifetime                 | years                  |            |         |           | 4.50           | 4.50 <sup>1</sup> | 3.50           |
| Live weight                         | kg                     |            |         |           | 200.00         | 200.00            | 140.00         |
| Raised piglets                      |                        |            |         |           | 20.00          | 20.00             | 22.00          |
| <b>Revenue</b>                      |                        |            |         |           |                |                   |                |
| Piglet                              | AZN or GEL/unit        |            |         |           | 1200.00        | 1200.00           | 1100.00        |
| Old Sow                             | AZN or GEL/unit        |            |         |           | 143.25         | 143.25            | 139.58         |
| <b>Total revenue</b>                | <b>AZN or GEL/unit</b> |            |         |           | <b>1343.25</b> | <b>1343.25</b>    | <b>1239.58</b> |
| <b>Variable costs</b>               |                        |            |         |           |                |                   |                |
| Flock replacement (male and female) | AZN or GEL/unit        |            |         |           | 59.10          | 59.10             | 71.90          |
| Feed costs                          | AZN or GEL/unit        |            |         |           | 510.00         | 510.00            | 510.00         |
| Veterinary care                     | AZN or GEL/unit        |            |         |           | 100.00         | 100.00            | 100.00         |
| Transport to market                 | AZN or GEL/unit        |            |         |           | 10.00          | 10.00             | 10.00          |
| <b>Total variable costs</b>         | <b>AZN or GEL/unit</b> |            |         |           | <b>679.10</b>  | <b>679.10</b>     | <b>691.90</b>  |
| <b>Contribution margin</b>          | <b>AZN or GEL/unit</b> |            |         |           | <b>664.15</b>  | <b>664.15</b>     | <b>547.68</b>  |
| <b>Contribution margin ratio</b>    | <b>%</b>               |            |         |           | <b>49.44</b>   | <b>49.44</b>      | <b>44.18</b>   |
|                                     |                        |            |         |           |                |                   |                |
| <i>Revenue</i>                      | <i>EUR/unit</i>        |            |         |           | 427.60         | 427.60            | 391.97         |
| <i>Variable costs</i>               | <i>EUR/unit</i>        |            |         |           | 241.99         | 241.99            | 246.55         |
| <i>Contribution margin</i>          | <i>EUR/unit</i>        |            |         |           | 236.66         | 236.66            | 195.16         |

<sup>1</sup> Calculation transferred from Gombori

**Table S7.** Cost-revenue calculation for chicken keeping (per hen unit).

| Item                                  | Unit                   | Azerbaijan   |              |              | Georgia      |              |                 |
|---------------------------------------|------------------------|--------------|--------------|--------------|--------------|--------------|-----------------|
|                                       |                        | Atabey       | Keremli      | Plankend     | Gombori      | Arashenda    | Shakhvetil      |
| Currency of calculation               |                        | AZN          | AZN          | AZN          | GEL          | GEL          | GEL             |
| <b>Main indicators</b>                |                        |              |              |              |              |              |                 |
| Number of hens                        | Head                   | 18           | 26           | 10           | 22           | 30           | 22 <sup>1</sup> |
| Number of sold chicken                | Head                   | 100          | 100          | 100          | 50           | 100          | 50              |
| Number of hens laying eggs            | Head                   | 9            | 10           | 8            | 10           | 15           | 10              |
| Number of eggs from one hen           | Head/year              | 210          | 210          | 210          | 200          | 210          | 200             |
| Price of hen (2 years old)            | AZN or GEL/head        | 2            | 2            | 2            | 4            | 4            | 4               |
| Price of one chicken (4.5 months old) | AZN or GEL/head        | 4            | 4            | 4            | 8            | 8            | 8               |
| Price of eggs                         | AZN or GEL/head        | 0.15         | 0.15         | 0.15         | 0.2          | 0.2          | 0.2             |
| Loss of hens                          | %                      | 10           | 10           | 10           | 10           | 10           | 10              |
| Loss of eggs                          | %                      | 15           | 15           | 15           | 15           | 15           | 15              |
| Loss of chicken                       | %                      | 28           | 25           | 25           | 28           | 25           | 28              |
| <b>Revenue</b>                        |                        |              |              |              |              |              |                 |
| Old hen                               | AZN or GEL/unit        | 1.80         | 1.80         | 1.80         | 3.00         | 3.12         | 3.00            |
| Eggs                                  | AZN or GEL/unit        | 13.39        | 10.30        | 21.42        | 15.45        | 17.85        | 15.45           |
| Chicken (after 4.5 months)            | AZN or GEL/unit        | 16.00        | 11.54        | 30.00        | 32.58        | 30.00        | 32.58           |
| <b>Total revenue</b>                  | <b>AZN or GEL/unit</b> | <b>31.19</b> | <b>23.64</b> | <b>53.22</b> | <b>51.04</b> | <b>50.97</b> | <b>51.04</b>    |
| <b>Variable costs</b>                 |                        |              |              |              |              |              |                 |
| Feed for chicken fattening            | AZN or GEL/unit        | 5.56         | 3.85         | 9.00         |              |              |                 |
| Wheat (500 kg; 0.3 AZN/kg)            | AZN or GEL/unit        | 8.33         | 5.77         | 12.00        | 20.91        | 17.67        | 20.91           |
| Mixed feed (100 kg; 0.65 AZN/kg)      | AZN or GEL/unit        | 3.61         | 2.50         | 5.20         | 5.45         | 8.00         | 5.45            |
| Medicine                              | AZN or GEL/unit        | 1.96         | 1.35         | 3.50         | 0.30         | 1.00         | 0.30            |
| <b>Total variable costs</b>           | <b>AZN or GEL/unit</b> | <b>19.46</b> | <b>13.47</b> | <b>29.70</b> | <b>26.66</b> | <b>26.67</b> | <b>26.66</b>    |
| <b>Contribution margin</b>            | <b>AZN or GEL/unit</b> | <b>11.73</b> | <b>10.17</b> | <b>23.52</b> | <b>24.37</b> | <b>24.30</b> | <b>24.37</b>    |
| <b>Contribution margin ratio</b>      | <b>%</b>               | <b>37.62</b> | <b>43.02</b> | <b>44.19</b> | <b>47.76</b> | <b>47.68</b> | <b>47.76</b>    |
|                                       |                        |              |              |              |              |              |                 |
| <i>Revenue</i>                        | <i>EUR/unit</i>        | <i>16.43</i> | <i>12.45</i> | <i>28.03</i> | <i>18.19</i> | <i>18.16</i> | <i>18.19</i>    |
| <i>Variable costs</i>                 | <i>EUR/unit</i>        | <i>10.25</i> | <i>7.09</i>  | <i>15.64</i> | <i>9.50</i>  | <i>9.50</i>  | <i>9.50</i>     |
| <i>Contribution margin</i>            | <i>EUR/unit</i>        | <i>6.18</i>  | <i>5.36</i>  | <i>12.39</i> | <i>8.68</i>  | <i>8.66</i>  | <i>8.68</i>     |

<sup>1</sup> Calculation transferred from Gombori

**Table S8.** Cost-revenue calculation for goose keeping (per goose unit).

| Item                             | Unit                   | Azerbaijan        |              |                   | Georgia |           |             |
|----------------------------------|------------------------|-------------------|--------------|-------------------|---------|-----------|-------------|
|                                  |                        | Atabey            | Keremli      | Plankend          | Gombori | Arashenda | Shakhvetila |
| Currency of calculation          |                        | AZN               | AZN          | AZN               | GEL     | GEL       | GEL         |
| <b>Main indicators</b>           |                        |                   |              |                   |         |           |             |
| Live weight                      | kg                     | 5.00 <sup>1</sup> | 5.00         | 5.00 <sup>1</sup> |         |           |             |
| Slaughter weight                 | kg                     | 3.00              | 3.00         | 3.00              |         |           |             |
| Price goose meat                 | AZN/kg                 | 7.00              | 7.00         | 7.00              |         |           |             |
| Price Feed (wheat)               | AZN/kg                 | 0.30              | 0.30         | 0.30              |         |           |             |
| Price Feed (potato)              | AZN/kg                 | 0.25              | 0.25         | 0.25              |         |           |             |
| Price feathers                   | AZN/kg                 | 3.33              | 3.33         | 3.33              |         |           |             |
| <b>Revenue</b>                   |                        |                   |              |                   |         |           |             |
| Meat                             | AZN or GEL/unit        | 21.00             | 21.00        | 21.00             |         |           |             |
| Feathers/downs                   | AZN or GEL/unit        | 1.00              | 1.00         | 1.00              |         |           |             |
| <b>Total revenue</b>             | <b>AZN or GEL/unit</b> | <b>22.00</b>      | <b>22.00</b> | <b>22.00</b>      |         |           |             |
| <b>Variable costs</b>            |                        |                   |              |                   |         |           |             |
| Feed (wheat, 30 kg)              | AZN or GEL/unit        | 9.00              | 9.00         | 9.00              |         |           |             |
| Feed (Potato, 5 kg)              | AZN or GEL/unit        | 1.25              | 1.25         | 1.25              |         |           |             |
| Medicine                         | AZN or GEL/unit        | 1.00              | 1.00         | 1.00              |         |           |             |
| <b>Total variable costs</b>      | <b>AZN or GEL/unit</b> | <b>11.25</b>      | <b>11.25</b> | <b>11.25</b>      |         |           |             |
| <b>Contribution margin</b>       | <b>AZN or GEL/unit</b> | <b>10.75</b>      | <b>10.75</b> | <b>10.75</b>      |         |           |             |
| <b>Contribution margin ratio</b> | <b>%</b>               | <b>48.86</b>      | <b>48.86</b> | <b>48.86</b>      |         |           |             |
|                                  |                        |                   |              |                   |         |           |             |
| <i>Revenue</i>                   | <i>EUR/unit</i>        | <i>11.59</i>      | <i>11.59</i> | <i>11.59</i>      |         |           |             |
| <i>Variable costs</i>            | <i>EUR/unit</i>        | <i>5.93</i>       | <i>5.93</i>  | <i>5.93</i>       |         |           |             |
| <i>Contribution margin</i>       | <i>EUR/unit</i>        | <i>5.66</i>       | <i>5.66</i>  | <i>5.66</i>       |         |           |             |

<sup>1</sup> Calculation transferred from Keremli

**Table S9.** Cost-revenue calculation for bee keeping (per beehive).

| Item                             | Unit                      | Azerbaijan    |               |               | Georgia       |               |               |
|----------------------------------|---------------------------|---------------|---------------|---------------|---------------|---------------|---------------|
|                                  |                           | Atabey        | Keremli       | Plankend      | Gombori       | Arashenda     | Shakhvetil    |
| Currency of calculation          |                           | AZN           | AZN           | AZN           | GEL           | GEL           | GEL           |
| <b>Revenue</b>                   |                           |               |               |               |               |               |               |
| Honey                            | kg                        | 10.00         | 12.00         | 8.00          | 22.00         | 22.00         | 22.00         |
| Loss of honey                    | %                         | 0.10          | 0.10          | 0.08          | 0.08          | 0.08          | 0.08          |
| Price                            | AZN or GEL/kg             | 20.00         | 20.00         | 20.00         | 15.00         | 15.00         | 15.00         |
| <b>Total revenue</b>             | <b>AZN or GEL/beehive</b> | <b>180.00</b> | <b>216.00</b> | <b>147.20</b> | <b>303.60</b> | <b>303.60</b> | <b>303.60</b> |
| <b>Variable costs</b>            |                           |               |               |               |               |               |               |
| Medicine                         | AZN or GEL/beehive        | 3.50          | 6.00          | 4.50          | 12.00         | 12.00         | 12.00         |
| Feed (sugar)                     | AZN or GEL/beehive        | 9.00          | 12.00         | 10.00         | 18.00         | 18.00         | 18.00         |
| Wax                              | AZN or GEL/beehive        | 1.20          | 1.20          | 1.50          | 2.4           | 2.4           | 2.4           |
| Frames                           | AZN or GEL/beehive        | 24.00         | 24.00         | 24.00         | 18            | 18            | 18            |
| Box                              | AZN or GEL/beehive        | 10.00         | 10.00         | 10.00         | 11            | 11            | 11            |
| Transport                        | AZN or GEL/beehive        | 5.00          | 5.00          | 5.00          | 15            | 4             | 10            |
| <b>Total variable costs</b>      | <b>AZN or GEL/beehive</b> | <b>52.70</b>  | <b>58.20</b>  | <b>55.00</b>  | <b>76.40</b>  | <b>65.40</b>  | <b>71.40</b>  |
| <b>Contribution margin</b>       | <b>AZN or GEL/beehive</b> | <b>127.30</b> | <b>157.80</b> | <b>92.20</b>  | <b>227.20</b> | <b>238.20</b> | <b>232.20</b> |
| <b>Contribution margin ratio</b> | <b>%</b>                  | <b>70.72</b>  | <b>73.06</b>  | <b>62.64</b>  | <b>74.84</b>  | <b>78.46</b>  | <b>76.48</b>  |
|                                  |                           |               |               |               |               |               |               |
| <i>Revenue</i>                   | <i>EUR/beehive</i>        | <i>94.81</i>  | <i>113.77</i> | <i>77.53</i>  | <i>159.91</i> | <i>159.91</i> | <i>159.91</i> |
| <i>Variable costs</i>            | <i>EUR/beehive</i>        | <i>27.76</i>  | <i>30.65</i>  | <i>28.97</i>  | <i>40.24</i>  | <i>34.45</i>  | <i>37.61</i>  |
| <i>Contribution margin</i>       | <i>EUR/beehive</i>        | <i>67.05</i>  | <i>83.11</i>  | <i>48.56</i>  | <i>119.67</i> | <i>125.46</i> | <i>122.30</i> |



### 3. Arable farming and hay production

Cost-revenue calculations were performed per land area (ha). As in the survey data the arable land area (homegarden, land plot and vineyard) was reported but no detailed coverage for each crop, assumptions on the coverage of wheat, potato, raspberry and other crops were needed for household income calculations. Based on observations during data collection, average percentage shares of crops for each village were set up.

**Table S10.** Average crop coverages of farmed land in the case study villages.

|                                                                 | Azerbaijan |                 |            | Georgia               |                      |            |
|-----------------------------------------------------------------|------------|-----------------|------------|-----------------------|----------------------|------------|
|                                                                 | Atabey     | Keremli         | Plankend   | Gombori               | Shakhvetila          | Arashenda  |
| <b>Homegarden</b>                                               |            |                 |            |                       |                      |            |
| Potato                                                          | 50         | 30              | 80         | 60                    | 40                   | 40         |
| Other vegetables and herbs<br>(e.g. cabbage, carrots and beans) | 50         | 50              | 20         | 40                    | 60                   | 60         |
| Raspberry                                                       |            | 20 <sup>1</sup> |            |                       |                      |            |
| <b>SUM Homegarden</b>                                           | <b>100</b> | <b>100</b>      | <b>100</b> | <b>100</b>            | <b>100</b>           | <b>100</b> |
| <b>Land plot</b>                                                |            |                 |            |                       |                      |            |
| Potato                                                          | 65         | 60              | 100        | 90                    |                      | 30         |
| Wheat                                                           | 35         | 40              |            |                       |                      | 70         |
| <b>SUM Land plot</b>                                            | <b>100</b> | <b>100</b>      | <b>100</b> | <b>90<sup>2</sup></b> | <b>0<sup>2</sup></b> | <b>100</b> |
| <b>Vineyard</b>                                                 |            |                 |            |                       |                      |            |
| Grapes                                                          |            |                 |            | 100                   | 100                  | 100        |
| <b>SUM Vineyard</b>                                             |            |                 |            | <b>100</b>            | <b>100</b>           | <b>100</b> |

<sup>1</sup>: For Raspberry production in Keremli, it was controlled for whether the household engages in raspberry cultivation based on household survey data

<sup>2</sup>: In Gombori, only a share of the land plot was used by the household. In Shakhvetila, most land plots were not cultivated, at all.

**Table S11.** Cost-revenue calculation for potatoes (per ha).

| Item                             | Unit                 | Azerbaijan     |                |                | Georgia       |                |                 |
|----------------------------------|----------------------|----------------|----------------|----------------|---------------|----------------|-----------------|
|                                  |                      | Atabey         | Keremli        | Plankend       | Gombori       | Arashenda      | Shakhvetil<br>a |
| Currency of calculation          |                      | AZN            | AZN            | AZN            | GEL           | GEL            | GEL             |
| <b>Main indicators</b>           |                      |                |                |                |               |                |                 |
| Total harvest                    | kg                   | 14285.00       | 8461.54        | 7692.31        | 2564.00       | 4764.71        | 3333.33         |
| Fodder potato                    | kg                   | 2857.00        | 1730.77        | 1346.15        | 1000.00       |                |                 |
| Potato for selling               | kg                   | 9999.50        | 4615.38        | 4230.77        | 1125.00       | 3676.47        | 2600.00         |
| Potato for self-consumption      | kg                   | 1428.50        | 2115.38        | 2115.38        | 439.00        | 1088.24        | 733.33          |
| <b>Revenue</b>                   |                      |                |                |                |               |                |                 |
| Fodder potato                    | AZN or GEL/ha        | 714.25         | 432.69         | 336.54         | 200.00        | 0.00           |                 |
| Potato for selling               | AZN or GEL/ha        | 4499.78        | 2307.69        | 2538.46        | 405.00        | 1323.53        | 1300.00         |
| Potato for self-consumption      | AZN or GEL/ha        | 642.83         | 1057.69        | 1269.23        | 158.04        | 391.76         | 366.67          |
| <b>Total revenue</b>             | <b>AZN or GEL/ha</b> | <b>5856.85</b> | <b>3798.08</b> | <b>4144.23</b> | <b>763.04</b> | <b>1715.29</b> | <b>1666.67</b>  |
| <b>Variable costs</b>            |                      |                |                |                |               |                |                 |
| Seed potatoes                    | AZN or GEL/ha        | 535.00         | 1153.85        | 961.54         | 42.00         | 264.71         | 450.00          |
| Fertilizer                       | AZN or GEL/ha        | 590.00         | 76.92          | 61.54          | 24.00         | 279.41         |                 |
| Phytosanitary measures           | AZN or GEL/ha        |                | 57.69          | 57.69          |               |                |                 |
| <i>Machine service costs</i>     |                      |                |                |                |               |                |                 |
| Cultivating (Plough)             | AZN or GEL/ha        | 70.00          | 115.38         | 211.54         | 35.00         | 35.29          | 60.00           |
| Harrowing                        | AZN or GEL/ha        | 50.00          | 115.38         |                | 35.00         |                |                 |
| Sowing                           | AZN or GEL/ha        | 200.00         |                |                | 35.00         |                |                 |
| Digging                          | AZN or GEL/ha        | 150.00         |                |                | 35.00         |                |                 |
| Transport                        | AZN or GEL/ha        | 30.00          | 38.46          | 38.46          | 15.00         |                |                 |
| <b>Total variable costs</b>      | <b>AZN or GEL/ha</b> | <b>1625.00</b> | <b>1557.69</b> | <b>1330.77</b> | <b>221.00</b> | <b>579.41</b>  | <b>510.00</b>   |
| <b>Contribution margin</b>       | <b>AZN or GEL/ha</b> | <b>4231.85</b> | <b>2240.38</b> | <b>2813.46</b> | <b>542.04</b> | <b>1135.88</b> | <b>1156.67</b>  |
| <b>Contribution margin ratio</b> | <b>%</b>             | <b>72.25</b>   | <b>58.99</b>   | <b>67.89</b>   | <b>71.04</b>  | <b>66.22</b>   | <b>69.40</b>    |
|                                  |                      |                |                |                |               |                |                 |
| <i>Revenue</i>                   | <i>EUR/ha</i>        | <i>3084.81</i> | <i>2000.45</i> | <i>2182.77</i> | <i>271.90</i> | <i>611.22</i>  | <i>593.89</i>   |
| <i>Variable costs</i>            | <i>EUR/ha</i>        | <i>855.89</i>  | <i>820.44</i>  | <i>700.92</i>  | <i>78.75</i>  | <i>206.47</i>  | <i>181.73</i>   |
| <i>Contribution margin</i>       | <i>EUR/ha</i>        | <i>2228.92</i> | <i>1180.01</i> | <i>1481.85</i> | <i>193.15</i> | <i>404.76</i>  | <i>412.16</i>   |

**Table S12.** Cost-revenue calculation for wheat (per ha).

| Item                             | Unit                 | Azerbaijan        |               |          | Georgia           |                |                   |
|----------------------------------|----------------------|-------------------|---------------|----------|-------------------|----------------|-------------------|
|                                  |                      | Atabey            | Keremli       | Plankend | Gombori           | Arashenda      | Shakhvetil<br>a   |
| Currency of calculation          |                      | AZN               | AZN           | AZN      | GEL               | GEL            | GEL               |
| <b>Main indicators</b>           |                      |                   |               |          |                   |                |                   |
| Yield                            | kg                   | 2000 <sup>1</sup> | 2000          |          | 2000 <sup>2</sup> | 2000           | 2000 <sup>2</sup> |
| Fodder wheat                     | kg                   | 900               | 900           |          | 2000              | 2000           | 2000              |
| Wheat for selling                | kg                   | 600               | 600           |          |                   |                |                   |
| Wheat for self-consumption       | kg                   | 500               | 500           |          |                   |                |                   |
| <b>Revenue</b>                   |                      |                   |               |          |                   |                |                   |
| Fodder wheat                     | AZN or GEL/ha        | 252.00            | 252.00        |          | 1000.00           | 1000.00        | 1000.00           |
| Wheat for selling                | AZN or GEL/ha        | 210.00            | 210.00        |          |                   |                |                   |
| Wheat for self-consumption       | AZN or GEL/ha        | 175.00            | 175.00        |          |                   |                |                   |
| Straw bales                      | AZN or GEL/ha        | 60.00             | 60.00         |          |                   |                |                   |
| <b>Total revenue</b>             | <b>AZN or GEL/ha</b> | <b>697.00</b>     | <b>697.00</b> |          | <b>1000.00</b>    | <b>1000.00</b> | <b>1000.00</b>    |
| <b>Variable costs</b>            |                      |                   |               |          |                   |                |                   |
| Seed                             | AZN or GEL/ha        | 100.00            | 80.00         |          | 240.00            | 240.00         | 240.00            |
| Fertilizer                       | AZN or GEL/ha        | 46.90             | 56.90         |          | 27.00             | 27.00          | 27.00             |
| Phytosanitary measures           | AZN or GEL/ha        | 40.00             | 20.00         |          |                   |                |                   |
| <b>Machine service costs</b>     |                      |                   |               |          |                   |                |                   |
| Cultivating                      | AZN or GEL/ha        | 40.00             | 35.00         |          | 40.00             | 40.00          | 40.00             |
| Mowing                           | AZN or GEL/ha        | 30.00             | 35.00         |          | 60.00             | 60.00          | 60.00             |
| Sowing                           | AZN or GEL/ha        | 20.00             | 30.00         |          | 50.00             | 50.00          | 50.00             |
| Baling                           | AZN or GEL/ha        | 45.00             | 45.00         |          | 60.00             | 60.00          | 60.00             |
| Storage                          | AZN or GEL/ha        | 10.00             | 10.00         |          | 10.00             | 10.00          | 10.00             |
| Transport                        | AZN or GEL/ha        | 25.00             | 30.00         |          | 20.00             | 20.00          | 20.00             |
| <b>Total variable costs</b>      | <b>AZN or GEL/ha</b> | <b>356.90</b>     | <b>341.90</b> |          | <b>507.00</b>     | <b>507.00</b>  | <b>507.00</b>     |
| <b>Contribution margin</b>       | <b>AZN or GEL/ha</b> | <b>340.10</b>     | <b>355.10</b> |          | <b>493.00</b>     | <b>493.00</b>  | <b>493.00</b>     |
| <b>Contribution margin ratio</b> | <b>%</b>             | <b>48.79</b>      | <b>50.95</b>  |          | <b>49.30</b>      | <b>49.30</b>   | <b>49.30</b>      |
|                                  |                      |                   |               |          |                   |                |                   |
| Revenue                          | EUR/ha               | 367.11            | 367.11        |          | 356.34            | 356.34         | 356.34            |
| Variable costs                   | EUR/ha               | 187.98            | 180.08        |          | 180.66            | 180.66         | 180.66            |
| Contribution margin              | EUR/ha               | 179.13            | 187.03        |          | 175.67            | 175.67         | 175.67            |

<sup>1</sup> Calculation transferred from Keremli, <sup>2</sup> Calculation transferred from Arashenda

**Table S13.** Cost-revenue calculation for raspberry (per ha).

| Item                             | Unit          | Azerbaijan |                |          | Georgia |           |                 |
|----------------------------------|---------------|------------|----------------|----------|---------|-----------|-----------------|
|                                  |               | Atabey     | Keremli        | Plankend | Gombori | Arashenda | Shakhvetil<br>a |
| Currency of calculation          |               | AZN        | AZN            | AZN      | GEL     | GEL       | GEL             |
| <b>Revenue</b>                   |               |            |                |          |         |           |                 |
| Product                          | kg            |            | 2500.00        |          |         |           |                 |
| Price                            | AZN/kg        |            | 2.00           |          |         |           |                 |
| <b>Total revenue</b>             | <b>AZN/ha</b> |            | <b>5000.00</b> |          |         |           |                 |
| <b>Variable costs</b>            |               |            |                |          |         |           |                 |
| Irrigation                       | AZN/ha        |            | 100.00         |          |         |           |                 |
| Replacement                      | AZN/ha        |            | 80.00          |          |         |           |                 |
| Fertilizer                       | AZN/ha        |            | 50.00          |          |         |           |                 |
| Phytosanitary treatments         | AZN/ha        |            | 100.00         |          |         |           |                 |
| Labour (picking)                 | AZN/ha        |            | 500.00         |          |         |           |                 |
| Equipment                        | AZN/ha        |            | 850.00         |          |         |           |                 |
| <b>Total variable costs</b>      | <b>AZN/ha</b> |            | <b>1980.00</b> |          |         |           |                 |
| <b>Contribution margin</b>       | <b>AZN/ha</b> |            | <b>3020.00</b> |          |         |           |                 |
| <b>Contribution margin ratio</b> | <b>%</b>      |            | <b>60.40</b>   |          |         |           |                 |
|                                  |               |            |                |          |         |           |                 |
| <i>Revenue</i>                   | <i>EUR/ha</i> |            | 2633.51        |          |         |           |                 |
| <i>Variable costs</i>            | <i>EUR/ha</i> |            | 1042.87        |          |         |           |                 |
| <i>Contribution margin</i>       | <i>EUR/ha</i> |            | 1590.64        |          |         |           |                 |

Note: Raspberries are only cultivated in larger quantities in Keremli. Although in other villages households use raspberries for self-consumption, as well, a scale of commercial production is only reached in Keremli.

**Table S14.** Cost-revenue calculation for grapes (per ha).

| Item                                                        | Unit                 | Azerbaijan |         |          | Georgia |                |                |
|-------------------------------------------------------------|----------------------|------------|---------|----------|---------|----------------|----------------|
|                                                             |                      | Atabey     | Keremli | Plankend | Gombori | Arashenda      | Shakhvetila    |
| Currency of calculation                                     |                      | AZN        | AZN     | AZN      | GEL     | GEL            | GEL            |
| <b>Main indicators</b>                                      |                      |            |         |          |         |                |                |
| Harvest                                                     | kg                   |            |         |          |         | 3000           | 3000           |
| Grapes for own consumption                                  | kg                   |            |         |          |         | 1200           | 1200           |
| Grapes for selling                                          | kg                   |            |         |          |         | 2800           | 2800           |
| <b>Revenue</b>                                              |                      |            |         |          |         |                |                |
| Grape for own consumption                                   | AZN or GEL/ha        |            |         |          |         | 780.00         | 780.00         |
| Grape for selling                                           | AZN or GEL/ha        |            |         |          |         | 1820.00        | 1820.00        |
| <b>Total revenue</b>                                        | <b>AZN or GEL/ha</b> |            |         |          |         | <b>2600.00</b> | <b>2600.00</b> |
| <b>Variable costs</b>                                       |                      |            |         |          |         |                |                |
| Irrigation                                                  | AZN or GEL/ha        |            |         |          |         | 30.00          | 30.00          |
| Replacement                                                 | AZN or GEL/ha        |            |         |          |         | 258.00         | 258.00         |
| Fertilizer                                                  | AZN or GEL/ha        |            |         |          |         | 150.00         | 150.00         |
| Phytosanitary measures (pesticides, herbicides, fungicides) | AZN or GEL/ha        |            |         |          |         | 600.00         | 600.00         |
| Weeding                                                     | AZN or GEL/ha        |            |         |          |         | 80.00          | 80.00          |
| Ploughing                                                   | AZN or GEL/ha        |            |         |          |         | 200.00         | 200.00         |
| Labour (picking, etc)                                       | AZN or GEL/ha        |            |         |          |         | 250.00         | 250.00         |
| Transport (from vineyard to factory)                        | AZN or GEL/ha        |            |         |          |         | 150.00         | 150.00         |
| <b>Total variable costs</b>                                 | <b>AZN or GEL/ha</b> |            |         |          |         | <b>1718.00</b> | <b>1718.00</b> |
| <b>Contribution margin</b>                                  | <b>AZN or GEL/ha</b> |            |         |          |         | <b>882.00</b>  | <b>882.00</b>  |
| <b>Contribution margin ratio</b>                            | <b>%</b>             |            |         |          |         | <b>33.92</b>   | <b>33.92</b>   |
|                                                             |                      |            |         |          |         |                |                |
| <i>Revenue</i>                                              | <i>EUR/ha</i>        |            |         |          |         | 926.47         | 926.47         |
| <i>Variable costs</i>                                       | <i>EUR/ha</i>        |            |         |          |         | 612.19         | 612.19         |
| <i>Contribution margin</i>                                  | <i>EUR/ha</i>        |            |         |          |         | 314.29         | 314.29         |

<sup>1</sup>: Calculation transferred from Arashenda. The climatic conditions in Shakhvetila do not allow for grape production, thus, households possess vineyards in other locations of Kakheti regions. It is assumed that the production technology and conditions in those locations are similar to Arashenda.

**Table S15.** Cost-revenue calculation for hay production (per ha).

| Item                                    | Unit                     | Azerbaijan    |               |               | Georgia       |                     |                     |
|-----------------------------------------|--------------------------|---------------|---------------|---------------|---------------|---------------------|---------------------|
|                                         |                          | Atabey        | Keremli       | Plankend      | Gombori       | Arashenda           | Shakhvetil<br>a     |
| Currency of calculation                 |                          | AZN           | AZN           | AZN           | GEL           | GEL                 | GEL                 |
| <b>Revenue</b>                          |                          |               |               |               |               |                     |                     |
| Hay                                     | bales/ha                 | 120.00        | 216.00        | 112.50        | 312.50        | 312.50 <sup>1</sup> | 312.50 <sup>1</sup> |
| Price                                   | AZN or<br>GEL/bale       | 3.00          | 1.80          | 3.00          | 2.50          | 2.50                | 2.50                |
| <b>Total revenue</b>                    | <b>AZN or<br/>GEL/ha</b> | <b>360.00</b> | <b>388.80</b> | <b>337.50</b> | <b>781.25</b> | <b>781.25</b>       | <b>781.25</b>       |
| <b>Variable costs</b>                   |                          |               |               |               |               |                     |                     |
| Mowing                                  | AZN or<br>GEL/ha         | 100.00        | 120.00        | 93.75         | 250.00        | 250.00              | 250.00              |
| Turning mowed hay                       | AZN or<br>GEL/ha         | 20.00         | 20.00         | 15.63         |               |                     |                     |
| Pressing                                | AZN or<br>GEL/ha         | 42.00         | 75.60         | 39.38         | 250           | 250                 | 250                 |
| Load up                                 | AZN or<br>GEL/ha         | 12.00         | 21.60         | 11.25         |               |                     |                     |
| Transport                               | AZN or<br>GEL/ha         | 25.00         | 50.00         | 62.50         | 10.00         | 10.00               | 10.00               |
| Unload                                  | AZN or<br>GEL/ha         | 12.00         | 21.60         | 11.25         |               |                     |                     |
| Stacking                                | AZN or<br>GEL/ha         | 12.00         | 0.30          | 0.94          |               |                     |                     |
| Pasture improvement<br>(clover seeding) | AZN or<br>GEL/ha         |               |               |               | 90            | 90                  | 90                  |
| <b>Total variable costs</b>             | <b>AZN or<br/>GEL/ha</b> | <b>223.00</b> | <b>309.10</b> | <b>234.69</b> | <b>600.00</b> | <b>600.00</b>       | <b>600.00</b>       |
| <b>Contribution margin</b>              | <b>AZN or<br/>GEL/ha</b> | <b>137.00</b> | <b>79.70</b>  | <b>102.81</b> | <b>181.25</b> | <b>181.25</b>       | <b>181.25</b>       |
| <b>Contribution margin ratio</b>        | <b>%</b>                 | <b>38.06</b>  | <b>20.50</b>  | <b>30.46</b>  | <b>23.20</b>  | <b>23.20</b>        | <b>23.20</b>        |
|                                         |                          |               |               |               |               |                     |                     |
| <i>Revenue</i>                          | <i>EUR/ha</i>            | <i>189.61</i> | <i>204.78</i> | <i>177.76</i> | <i>278.39</i> | <i>278.39</i>       | <i>278.39</i>       |
| <i>Variable costs</i>                   | <i>EUR/ha</i>            | <i>117.45</i> | <i>162.80</i> | <i>123.61</i> | <i>213.80</i> | <i>213.80</i>       | <i>213.80</i>       |
| <i>Contribution margin</i>              | <i>EUR/ha</i>            | <i>72.16</i>  | <i>41.98</i>  | <i>54.15</i>  | <i>64.59</i>  | <i>64.59</i>        | <i>64.59</i>        |

<sup>1</sup> Calculation transferred from Gombori

#### 4. Summary of contribution margin calculations

**Table S16.** Summary of contribution margins for all agricultural activities included in the income calculation.

| Item       | Unit                 | Azerbaijan |         |          | Georgia |           |                 |
|------------|----------------------|------------|---------|----------|---------|-----------|-----------------|
|            |                      | Atabey     | Keremli | Plankend | Gombori | Arashenda | Shakhvetil<br>a |
| Cattle     | EUR/milk cow unit    | 252.76     | 236.12  | 210.59   | 263.07  | 271.53    | 263.69          |
| Sheep      | EUR/ewe unit         | 40.77      | 34.67   | 36.90    | 30.23   | 28.54     | 29.58           |
| Goats      | EUR/mother goat unit | 31.79      | 33.68   | 39.33    | 20.24   | 21.52     | 20.67           |
| Pigs       | EUR/sow unit         | N/A        | N/A     | N/A      | 236.66  | 236.66    | 195.16          |
| Chicken    | EUR/hen unit         | 6.18       | 5.36    | 12.39    | 8.68    | 8.66      | 8.68            |
| Geese      | EUR/goose unit       | 5.66       | 5.66    | 5.66     |         |           |                 |
| Beekeeping | EUR/bee hive         | 67.05      | 83.11   | 48.56    | 80.96   | 84.88     | 82.74           |
| Potato     | EUR/ha               | 2228.92    | 1180.01 | 1481.85  | 193.15  | 404.76    | 412.16          |
| Wheat      | EUR/ha               | 179.13     | 187.03  | N/A      | 175.67  | 175.67    | 175.67          |
| Raspberry  | EUR/ha               | N/A        | 1590.64 | N/A      | N/A     | N/A       | N/A             |
| Grapes     | EUR/ha               | N/A        | N/A     | N/A      | N/A     | 314.29    | 314.29          |
| Hay meadow | EUR/ha               | 72.16      | 41.98   | 54.15    | 64.59   | 64.59     | 64.59           |

N/A: activity not performed in the respective village

## 5. Off-farm income

The households survey records the number of household income sources in the respective category. Off-farm household income was calculated by multiplying entries in the respective categories with average wages and estimates from statistics. Amounts per month in all categories were multiplied with 12 months, except for "Seasonal salaried work", which was multiplied with 6 months.

**Table S17.** Calculation basis for categories of off-farm income for Azerbaijani case study villages.

| Household survey income category            | Amount (AZN/month) | Amount (EUR/month) | Calculation information                                                                                                                                                                                                                                                                                                                                                                                                                                                   | Source                                                 |
|---------------------------------------------|--------------------|--------------------|---------------------------------------------------------------------------------------------------------------------------------------------------------------------------------------------------------------------------------------------------------------------------------------------------------------------------------------------------------------------------------------------------------------------------------------------------------------------------|--------------------------------------------------------|
| Public employment                           | 388.81             | 204.79             | calculated from the categories "Electricity, gas and steam production, distribution and supply", "Water supply; waste treatment and disposal", "Information and communication", "Professional, scientific and technical activities", "Administrative and support service activities", "Public administration and defence; social security", "Education", "Human health and social work activities" and "Art, entertainment and recreation" (figures for "state" category) | State Statistical Committee 2017: 36                   |
| Permanent employment in private enterprises | 482.45             | 254.11             | calculated from the categories "Manufacturing" and "Accommodation and food service activities" (figures for "non-state" category)                                                                                                                                                                                                                                                                                                                                         | State Statistical Committee 2017: 36                   |
| Self-employment                             | 530.97             | 279.66             | calculated from the categories "Trade; repair of transport means", "Transportation and storage" and "Accommodation and food service activities" (figures for "non-state" category)                                                                                                                                                                                                                                                                                        | State Statistical Committee 2017: 36                   |
| Seasonal salaried work                      | 696.45             | 366.82             | calculated from the categories "Construction" and "Accommodation and food service activities" (figures for "non-state" category), calculated for 6 months a year                                                                                                                                                                                                                                                                                                          | State Statistical Committee 2017: 36                   |
| Pension                                     | 177.60             | 93.54              | mean value for "Pension"                                                                                                                                                                                                                                                                                                                                                                                                                                                  | State Statistical Committee 2017: 38                   |
| Other state benefits                        | 35.49              | 18.69              | "State social assistance per person targeted"                                                                                                                                                                                                                                                                                                                                                                                                                             | State Statistical Committee 2017: 38                   |
| Other private benefits                      | 27.8               | 14.64              | "Other incomes" as sum of "income from other households" and "money received from abroad"                                                                                                                                                                                                                                                                                                                                                                                 | State Statistical Committee 2019: Budget of households |

All figures for 2016 per person and month

Sources:

State Statistical Committee of Azerbaijan. 2017. Azerbaijan in figures 2017. Baku: State Statistical Committee of Azerbaijan.

State Statistical Committee of Azerbaijan. 2019. Statistical information about Azerbaijan, available from: <https://www.stat.gov.az>



**Table S18.** Calculation basis for categories of off-farm income for Georgian case study villages.

| Household survey income category            | Amount (GEL/month ) | Amount (EUR/month ) | Calculation information                                                                                                                                                                                                                             | Reference                                                                                                                                      |
|---------------------------------------------|---------------------|---------------------|-----------------------------------------------------------------------------------------------------------------------------------------------------------------------------------------------------------------------------------------------------|------------------------------------------------------------------------------------------------------------------------------------------------|
| Public employment                           | 822.14              | 292.96              | calculated from the categories "Electricity, gas and water supply", "Public administration", "Education", "Health and social work" and "Community, social and personal service activities" (figures for "public" category)                          | National Statistics Office of Georgia 2019: Average monthly nominal earnings of employees in public and non-public sector by economic activity |
| Permanent employment in private enterprises | 902.71              | 321.67              | calculated from the categories "Manufacturing", "Hotels and restaurants" and "Transport and communications" (figures for "non-public" category)                                                                                                     | National Statistics Office of Georgia 2019: Average monthly nominal earnings of employees in public and non-public sector by economic activity |
| Self-employment                             | 905.93              | 322.82              | calculated from the categories "Trade; repair of motor vehicles and personal and household goods", "Hotels and restaurants" and "Transport and communications " (figures for "non-public" category)                                                 | National Statistics Office of Georgia 2019: Average monthly nominal earnings of employees in public and non-public sector by economic activity |
| Seasonal salaried work                      | 997.28              | 355.37              | calculated from the categories "Construction", "Trade; repair of motor vehicles and personal and household goods", "Hotels and restaurants" and "Transport and communications " (figures for "non-public" category), calculated for 6 months a year | National Statistics Office of Georgia 2019: Average monthly nominal earnings of employees in public and non-public sector by economic activity |
| Pension                                     | 153.88              | 54.83               | "Pensions, scholarships, assistances"                                                                                                                                                                                                               | National Statistics Office of Georgia 2019: Distribution of Average Monthly Incomes per Household by Years                                     |
| Other state benefits                        | 153.88              | 54.83               | "Pensions, scholarships, assistances"                                                                                                                                                                                                               | National Statistics Office of Georgia 2019: Distribution of Average Monthly Incomes per Household by Years                                     |
| Other private benefits                      | 131.54              | 46.87               | Sum of "Remittances from abroad" and "Money received as gift"                                                                                                                                                                                       | National Statistics Office of Georgia 2019: Distribution of Average Monthly Incomes per Household by Years                                     |

All figures for 2016 per person and month

Source: National Statistics Office of Georgia 2019. Statistical Information about Georgia. Available from <https://www.geostat.ge>

## Supplementary Material S19: Household survey data

### 1. Demographics: Characteristics of household heads

**Table S20.** Characteristics of household heads.

| Item                                       | Unit    | Azerbaijani villages |                 |                 |                 | Georgian villages |                 |              |                 |
|--------------------------------------------|---------|----------------------|-----------------|-----------------|-----------------|-------------------|-----------------|--------------|-----------------|
|                                            |         | Atabey               | Keremli         | Plankend        | Average         | Shakhvetil        | Gombori         | Arashenda    | Average         |
| Age                                        | years   | 53.8<br>(12.64)      | 52.0<br>(15.18) | 54.7<br>(11.85) | 53.5<br>(13.17) | 59.1 (14.98)      | 59.5<br>(14.88) | 58.0 (11.53) | 58.9<br>(13.89) |
| Female                                     | percent | 11.3                 | 12.2            | 7.7             | 10.6            | 8.8               | 23.1            | 8.2          | 15.5            |
| <b>Education</b>                           |         |                      |                 |                 |                 |                   |                 |              |                 |
| Graduated from primary school              | percent | 0.0                  | 2.4             | 0.0             | 0.7             | 5.9               | 3.8             | 0.0          | 3.1             |
| Graduated from school                      | percent | 74.2                 | 65.9            | 79.5            | 73.2            | 61.8              | 55.1            | 34.7         | 50.3            |
| Student in vocational school               | percent | 1.6                  | 0.0             | 0.0             | 0.7             | 0.0               | 0.0             | 0.0          | 0.0             |
| Graduated from vocational school           | percent | 3.2                  | 7.3             | 5.1             | 4.9             | 2.9               | 14.1            | 2.0          | 8.1             |
| Graduated from college or technical school | percent | 8.1                  | 4.9             | 0.0             | 4.9             | 23.5              | 15.4            | 30.6         | 21.7            |
| Student in university                      | percent | 0.0                  | 2.4             | 0.0             | 0.7             | 0.0               | 0.0             | 0.0          | 0.0             |
| Graduated from university                  | percent | 12.9                 | 17.1            | 15.4            | 14.8            | 5.9               | 11.5            | 32.7         | 16.8            |

N = 303, Table displays percent of households or means. Standard deviation in brackets.

2. *Livestock, poultry and beekeeping*

**Table S21.** Supplementary data on livestock, poultry and beekeeping.

| Item                                | Unit                   | Azerbaijani villages |              |              |              | Georgian villages |             |              |              |
|-------------------------------------|------------------------|----------------------|--------------|--------------|--------------|-------------------|-------------|--------------|--------------|
|                                     |                        | Atabey               | Keremli      | Plankend     | Average      | Shakhvetil        | Gombori     | Arashenda    | Average      |
| <b>Households keeping livestock</b> |                        | <b>100</b>           | <b>100</b>   | <b>100</b>   | <b>100</b>   | <b>100</b>        | <b>100</b>  | <b>100</b>   | <b>100</b>   |
| Dairy cow                           | % of households        | 95                   | 98           | 56           | 85           | 85                | 91          | 92           | 90           |
|                                     | Average (heads)        | 2.4 (1.58)           | 5.3 (3.42)   | 1.6 (1.33)   | 3.2 (2.77)   | 3.8 (3.75)        | 2.3 (1.44)  | 4.1 (9.56)   | 3.1 (5.69)   |
| Ewe                                 | % of households        | 56                   | 44           | 79           | 59           | 35                | 58          | 31           | 45           |
|                                     | Average (heads)        | 20.4 (49.72)         | 15.4 (11.12) | 9.5 (8.92)   | 15.3 (33.02) | 6.2 (5.06)        | 7.6 (14.44) | 15.4 (16.46) | 9.0 (14.07)  |
| Mother goat                         | % of households        | 26                   | 39           | 8            | 25           |                   | 9           | 6            | 6            |
|                                     | Average (heads)        | 8.5 (16.62)          | 4.5 (2.76)   | 11.3 (16.17) | 6.9 (12.09)  | 0.0 (0.00)        | 1.9 (0.69)  | 1.7 (1.15)   | 1.8 (0.79)   |
| Pig Sow                             | % of households        | 0                    | 0            | 0            | 0            | 53                | 14          | 24           | 25           |
|                                     | Average (heads)        |                      |              |              |              | 6.8 (9.38)        | 2.3 (1.19)  | 2.1 (1.44)   | 4.2 (6.62)   |
| Horse                               | % of households        | 18                   | 27           | 10           | 18           | 6                 | 37          | 6            | 21           |
|                                     | Average (heads)        | 1.0 (0.00)           | 1.5 (0.93)   | 1.3 (0.50)   | 1.3 (0.67)   | 1.0 (0.00)        | 1.1 (0.31)  | 1.0 (0.00)   | 1.1 (0.29)   |
| Donkey                              | % of households        | 0                    | 5            | 5            | 3            | 3                 | 6           | 10           | 7            |
|                                     | Average (heads)        |                      | 1.5 (0.71)   | 1.0 (0.00)   | 1.3 (0.50)   | 2.0 (0.00)        | 1.0 (0.00)  | 1.0 (0.00)   | 1.1 (0.30)   |
| <b>Beekeeping</b>                   | <b>% of households</b> | 23                   | 27           | 13           | 21           | 29                | 8           | 10           | 13           |
|                                     | Average (beehives)     | 3.4 (3.61)           | 3.3 (2.61)   | 2.8 (1.30)   | 3.3 (2.91)   | 5.1 (3.11)        | 3.0 (2.45)  | 4.2 (2.39)   | 4.3 (2.80)   |
| <b>Poultry keeping</b>              | <b>% of households</b> | 95                   | 95           | 97           | 96           | 76                | 83          | 96           | 86           |
| Hens                                | % of households        | 92                   | 95           | 97           | 94           | 76                | 82          | 96           | 85           |
|                                     | Average (heads)        | 12.2 (7.04)          | 26.5 (22.54) | 7.9 (5.56)   | 15.1 (15.20) | 18.2 (34.52)      | 11.2 (6.38) | 32.2 (33.29) | 19.2 (26.04) |
| Turkeys                             | % of households        | 18                   | 29           | 26           | 23           | 12                | 6           | 43           | 19           |
|                                     | Average (heads)        | 2.3 (1.27)           | 6.9 (6.69)   | 2.2 (1.55)   | 3.9 (4.67)   | 4.0 (2.16)        | 3.0 (1.41)  | 8.0 (8.26)   | 6.7 (7.25)   |
| Geese                               | % of households        | 45                   | 61           | 62           | 54           | 6                 | 5           | 4            | 5            |
|                                     | Average (heads)        | 5.5 (3.98)           | 7.4 (5.24)   | 8.9 (10.37)  | 7.2 (6.99)   | 3.0 (0.00)        | 4.5 (3.42)  | 4.0 (1.41)   | 4.0 (2.39)   |
| Ducks                               | % of households        | 31                   | 22           | 31           | 28           | 3                 | 6           | 8            | 6            |
|                                     | Average (heads)        | 3.5 (1.26)           | 3.9 (1.96)   | 3.7 (2.31)   | 3.7 (1.75)   | 2.5 (0.71)        | 3.8 (3.70)  | 5.8 (3.30)   | 4.5 (3.31)   |

N = 303, Table displays percent of households or means. Standard deviation in brackets.

3. *Arable farming and use of fruits*

**Table S22.** Supplementary data on arable farming and use of fruits.

| Item                  | Unit                   | Azerbaijani villages |            |            |            | Georgian villages |            |            |            |
|-----------------------|------------------------|----------------------|------------|------------|------------|-------------------|------------|------------|------------|
|                       |                        | Atabey               | Keremli    | Plankend   | Average    | Shakhvetila       | Gombori    | Arashenda  | Average    |
| <b>Arable farming</b> | <b>% of households</b> | <b>100</b>           | <b>100</b> | <b>100</b> | <b>100</b> | <b>100</b>        | <b>94</b>  | <b>100</b> | <b>97</b>  |
| Home garden           | % of households        | 100                  | 100        | 100        | 100        | 100               | 91         | 98         | 95         |
|                       | Average                | 0.3 (0.10)           | 0.4 (0.55) | 0.3 (0.27) | 0.3 (0.33) | 0.4 (0.28)        | 0.3 (0.32) | 0.3 (0.45) | 0.3 (0.36) |
| Land plot             | % of households        | 87                   | 61         | 56         | 71         | 68                | 38         | 84         | 58         |
|                       | Average                | 2.4 (1.24)           | 2.4 (1.45) | 0.4 (0.35) | 2.0 (1.43) | 0.5 (0.33)        | 0.9 (0.81) | 1.9 (2.63) | 1.2 (1.90) |
| Hay meadow            | % of households        | 77                   | 54         | 54         | 64         | 65                | 71         | 14         | 52         |
|                       | Average                | 1.0 (0.81)           | 1.8 (0.74) | 0.3 (0.18) | 1.0 (0.88) | 0.6 (0.27)        | 1.0 (0.55) | 0.7 (0.31) | 0.9 (0.51) |
| Vineyard              | % of households        | 0                    | 0          | 0          | 0          | 0                 | 3          | 71         | 22         |
|                       | Average                |                      |            |            |            |                   | 1.2 (0.00) | 1.5 (2.51) | 1.5 (2.47) |
| Wheat cultivation     | % of households        | 81                   | 63         | 0          | 54         | 3                 | 1          | 59         | 19         |
| Potato cultivation    | % of households        | 94                   | 83         | 97         | 92         | 62                | 88         | 53         | 72         |
| Crops                 | Crop species           | 5.5 (3.40)           | 7.0 (3.86) | 6.3 (3.72) | 6.2 (3.65) | 8.0 (2.94)        | 6.6 (3.56) | 8.8 (3.06) | 7.6 (3.40) |
| Raspberry cultivation | % of households        |                      | 37         |            |            |                   |            |            |            |
| <b>Use of fruits</b>  | <b>% of households</b> | <b>84</b>            | <b>90</b>  | <b>95</b>  | <b>89</b>  | <b>100</b>        | <b>94</b>  | <b>98</b>  | <b>96</b>  |
| Fruits used           | Fruit species          | 3.8 (1.65)           | 4.9 (2.42) | 4.0 (1.77) | 4.2 (1.98) | 5.9 (2.57)        | 4.7 (2.11) | 5.5 (2.43) | 5.2 (2.36) |

N = 303, Table displays percent of households or means. Standard deviation in brackets.

4. *Off-farm income sources*

**Table S23.** Supplementary data on off-farm income sources.

| Item                                        | Unit                    | Azerbaijani villages |             |             |             | Georgian villages |             |             |             |
|---------------------------------------------|-------------------------|----------------------|-------------|-------------|-------------|-------------------|-------------|-------------|-------------|
|                                             |                         | Atabey               | Keremli     | Plankendi   | Average     | Shakhvetil        | Gombori     | Arashenda   | Average     |
| <b>Off-farm income</b>                      | <b>% of households</b>  | 77                   | 88          | 74          | 80          | 71                | 79          | 88          | 80          |
|                                             | Off-farm income sources | 1.15 (0.36)          | 1.72 (0.81) | 1.59 (0.63) | 1.44 (0.65) | 1.33 (0.56)       | 1.61 (0.73) | 1.58 (0.73) | 1.55 (0.71) |
| Public employment                           | % of households         | 16                   | 49          | 15          | 25          | 12                | 36          | 45          | 34          |
| Permanent employment in private enterprises | % of households         | 2                    | 0           | 0           | 1           | 3                 | 3           | 0           | 2           |
| Self-employment                             | % of households         | 6                    | 5           | 10          | 7           | 9                 | 4           | 8           | 6           |
| Salaried seasonal work                      | % of households         | 16                   | 20          | 13          | 16          | 6                 | 23          | 24          | 20          |
| Pension                                     | % of households         | 47                   | 66          | 54          | 54          | 50                | 58          | 59          | 57          |
| Other state benefits                        | % of households         | 0                    | 5           | 5           | 3           | 9                 | 5           | 0           | 4           |
| Other private benefits                      | % of households         | 2                    | 7           | 21          | 8           | 6                 | 0           | 2           | 2           |

N = 303, Table displays percent of households or means. Standard deviation in brackets.

# Supplementary Material S24: Supplementary results of regression analyses

**Table S25.** Robust multiple OLS regression analysis for influential variables on household income in Azerbaijani case study villages.

| Item                                               | Reduced model 1         | Reduced model 2         | Reduced model 3         | Reduced model 4         | Full model 5            |
|----------------------------------------------------|-------------------------|-------------------------|-------------------------|-------------------------|-------------------------|
|                                                    | Coeff (Robust Std. Err) |
| <i>Diversification</i>                             |                         |                         |                         |                         |                         |
| Diversification Index (HHI)                        | 1483.758 (1553.218)     | 3303.445 (912.649)***   | 3096.246 (759.032)***   | 3114.928 (761.181)***   | 2021.195 (749.192)***   |
| <i>Household assets</i>                            |                         |                         |                         |                         |                         |
| Land area owned by household                       |                         | 826.446 (69.338)***     | 823.767 (64.168)***     | 836.067 (65.337)***     | 755.766 (60.954)***     |
| Livestock owned in Livestock units                 |                         | 193.728 (21.323)***     | 187.796 (27.633)***     | 187.696 (27.597)***     | 209.656 (20.188)***     |
| Number of working age household members            |                         | 14.346 (130.283)        | 53.363 (102.994)        | 33.801 (106.674)        | 87.981 (91.048)         |
| <i>Additional activity variables</i>               |                         |                         |                         |                         |                         |
| Presence of an off-farm income source (Dummy)      |                         |                         | 2438.100 (233.836)***   | 2441.926 (234.948)***   | 2799.037 (204.442)***   |
| Presence of a social benefit income source (Dummy) |                         |                         | 904.227 (229.301)***    | 903.456 (242.532)***    | 1139.356 (187.745)***   |
| Semi-mobile livestock keeping (Dummy)              |                         |                         | 453.133 (299.792)       | 486.165 (297.816)       | 254.299 (284.971)       |
| <i>Characteristics of household head</i>           |                         |                         |                         |                         |                         |
| Age of household head                              |                         |                         |                         | -6.728 (9.440)          | -6.003 (8.749)          |
| Gender of household head                           |                         |                         |                         | 22.275 (316.535)        | -35.964 (256.609)       |
| Education of household head                        |                         |                         |                         | -43.152 (60.699)        | -28.510 (53.077)        |
| <i>Location variables</i>                          |                         |                         |                         |                         |                         |
| Scarce pasture resources (Dummy; Plankend=1)       |                         |                         |                         |                         | 904.676 (357.163)**     |
| Remote location (Dummy; Atabey=1)                  |                         |                         |                         |                         | 1846.470 (302.779)***   |
| <i>Constant</i>                                    | 4733.975 (573.775)***   | 893.448 (544.283)       | -694.680 (433.280)      | -103.490 (765.786)      | -1241.131 (627.215)*    |
| <i>Model statistics</i>                            |                         |                         |                         |                         |                         |
| Observations                                       | 142                     | 142                     | 142                     | 142                     | 142                     |
| Prob > F                                           | 0.3411                  | 0.0000                  | 0.0000                  | 0.0000                  | 0.0000                  |
| R-squared                                          | 0.0069                  | 0.6811                  | 0.8308                  | 0.8327                  | 0.8830                  |

Notes: displayed are coefficients and robust standard errors. Significance levels: \*:  $p < 0.1$ ; \*\*:  $p < 0.05$ ; \*\*\*:  $p < 0.01$

**Table S26.** Robust multiple OLS regression analysis for influential variables on household income in Georgian case study villages.

| Item                                               | Reduced model 1         | Reduced model 2         | Reduced model 3         | Reduced model 4         | Full model 5            |
|----------------------------------------------------|-------------------------|-------------------------|-------------------------|-------------------------|-------------------------|
|                                                    | Coeff (Robust Std. Err) |
| <i>Diversification</i>                             |                         |                         |                         |                         |                         |
| Diversification Index (HHI)                        | 3337.169 (1086.973)***  | 4457.033 (792.963)***   | 406.738 (475.793)       | 393.885 (499.923)       | 594.011 (532.039)       |
| <i>Household assets</i>                            |                         |                         |                         |                         |                         |
| Land area owned by household                       |                         | 447.122 (59.295)***     | 215.508 (45.479)***     | 212.353 (46.492)***     | 205.806 (44.855)***     |
| Livestock owned in Livestock units                 |                         | 161.323 (32.494)***     | 208.081 (20.416)***     | 205.578 (20.830)***     | 201.817 (20.656)***     |
| Number of working age household members            |                         | -43.197 (140.287)       | -121.662 (59.202)**     | -134.701 (67.857)**     | -110.684 (72.550)       |
| <i>Additional activity variables</i>               |                         |                         |                         |                         |                         |
| Presence of an off-farm income source (Dummy)      |                         |                         | 4310.909 (205.725)***   | 4297.675 (224.621)***   | 4252.788 (244.340)***   |
| Presence of a social benefit income source (Dummy) |                         |                         | 937.221 (183.034)***    | 901.987 (193.630)***    | 929.999 (191.569)***    |
| Semi-mobile livestock keeping (Dummy)              |                         |                         | 481.756 (1386.632)      | 687.722 (1411.987)      | 746.431 (1353.411)      |
| <i>Characteristics of household head</i>           |                         |                         |                         |                         |                         |
| Age of household head                              |                         |                         |                         | -2.800 (6.693)          | -1.689 (6.824)          |
| Gender of household head                           |                         |                         |                         | 230.231 (252.330)       | 174.753 (239.916)       |
| Education of household head                        |                         |                         |                         | -8.115 (35.395)         | -19.862 (35.401)        |
| <i>Location variables</i>                          |                         |                         |                         |                         |                         |
| Scarce pasture resources (Dummy; Arashenda =1)     |                         |                         |                         |                         | 414.467 (214.889)*      |
| Remote location (Dummy; Shakhvetila =1)            |                         |                         |                         |                         | 281.700 (239.613)       |
| <i>Constant</i>                                    | 2500.332 (520.235)***   | 331.443 (474.848)       | -100.817 (313.818)      | 0.533 (675.205)         | -242.113 (702.875)      |
| <i>Model statistics</i>                            |                         |                         |                         |                         |                         |
| Observations                                       | 161                     | 161                     | 161                     | 161                     | 161                     |
| Prob > F                                           | 0.0025                  | 0.0000                  | 0.0000                  | 0.0000                  | 0.0000                  |
| R-squared                                          | 0.0694                  | 0.5161                  | 0.8937                  | 0.8946                  | 0.8975                  |

Notes: displayed are coefficients and robust standard errors. Significance levels: \*: p<0.1; \*\*: p<0.05; \*\*\*: p<0.01
